# Supplementary material for: Current clinical practice and challenges in the management of secondary immunodeficiency in hematological malignancies
Source: PubMed Central journal article supplement — Eur J Haematol. 2019 Mar 24;102(6):447–56. doi: 10.1111/ejh.13223 (PMC6849602; doi:10.1111/ejh.13223), 2019-03-24
Supplement: EJH-102-447-s002.pdf [file EJH-102-447-s002.pdf]

## Supplementary Material

### Questionnaire

#### Q1: What is your primary medical specialty?

- a) Haematologist/Oncologist
- b) Internal Medicine
- c) Immunologist
- d) Paediatrician
- e) Other (*please specify*)

#### Q2: IgG Treatment

Are you responsible for the diagnosis of secondary immune deficiency (SID) and the prescription of immunoglobulin (IgG) treatment in patients with haematological malignancies?

- a) Yes
- b) I am responsible for the diagnosis of SID but for treatment with IgG, I refer patients to the local immunologist.
- c) No (*thank and terminate*)

*Choices e) and f) are only shown if respondent is from USA*

#### Q3: Please estimate the % of time you spend caring for patients in the following settings:

- a) University/teaching hospital
- b) Other hospital
- c) Outpatient clinic
- d) Private practice
- e) Infusion clinic
- f) Homecare
- g) Other (*specify*)

#### Q4: Duration of clinical experience

- d) <5 years
- e) 5-15 years
- f) >15 years

Quota: 20 patients or more for hematologists / oncologists, 5 patients or more for other medical specialties.

**Q5: In your practice, approximately how many patients with haematological malignancies—especially CLL and MM—have you provided care for over the last 12 months?**

*Indicate approximate number of patients*

|     |                                   | Approx. # of patients |
|-----|-----------------------------------|-----------------------|
| a.) | CLL                               |                       |
| b.) | MM                                |                       |
| c.) | Non-Hodgkin Lymphoma              |                       |
| d.) | Other lymphoproliferative disease |                       |

**Q6: Of the patients you provided care for over the last 12 months, approximately what % underwent hematopoietic stem cell transplantation (HSCT)?**

*Indicate approximate % of patients*

|     |                                   | % of patients who underwent HSCT over the last 12 months |
|-----|-----------------------------------|----------------------------------------------------------|
| a.) | CLL                               |                                                          |
| b.) | MM                                |                                                          |
| c.) | Non-Hodgkin Lymphoma              |                                                          |
| d.) | Other lymphoproliferative disease |                                                          |

The sum of each line has to be = 100%

**Q7: For those patients that underwent HSCT over the last 12 months, please indicate which proportion underwent allogeneic HSCT vs. autologous HSCT:**

Indicate approximate % of patients.

|     |                                   | % of patients who underwent <b>allogeneic</b> HSCT | % of patients who underwent <b>autologous</b> HSCT |
|-----|-----------------------------------|----------------------------------------------------|----------------------------------------------------|
| a.) | CLL                               |                                                    |                                                    |
| b.) | MM                                |                                                    |                                                    |
| c.) | Non-Hodgkin Lymphoma              |                                                    |                                                    |
| d.) | Other lymphoproliferative disease |                                                    |                                                    |

**Q8: What percentage of your patients develop severe or recurring infections and/or hypogammaglobulinemia (<4 g/l)?**

Indicate percentage

|     |                                   | Severe or recurring infections | Hypogammaglobulinemia |
|-----|-----------------------------------|--------------------------------|-----------------------|
| a.) | CLL                               |                                |                       |
| b.) | MM                                |                                |                       |
| c.) | Non-Hodgkin Lymphoma              |                                |                       |
| d.) | Other lymphoproliferative disease |                                |                       |

**Q9: Subsequent to an HSCT, what percentage of your patients develop severe or recurring infections and/or hypogammaglobulinemia (<4 g/l)?**

*Indicate percentage*

|     |                                   | Severe or recurring infections | Hypogammaglobulinemia |
|-----|-----------------------------------|--------------------------------|-----------------------|
| a.) | CLL                               |                                |                       |
| b.) | MM                                |                                |                       |
| c.) | Non-Hodgkin Lymphoma              |                                |                       |
| d.) | Other lymphoproliferative disease |                                |                       |

**Q10: In what percentage of patients do you measure serum Ig levels?**

*Indicate percentage*

|     |                                   | % of patients |
|-----|-----------------------------------|---------------|
| a.) | CLL                               |               |
| b.) | MM                                |               |
| d.) | Non-Hodgkin Lymphoma              |               |
| e.) | Other lymphoproliferative disease |               |

**Q11: In what percentage of patients undergoing HSCT do you measure serum Ig levels?**

*Indicate percentage*

|     |                                   | Prior to any HSCT | Subsequent to <b>allogenic</b> HSCT | Subsequent to <b>autologous</b> HSCT |
|-----|-----------------------------------|-------------------|-------------------------------------|--------------------------------------|
| a.) | CLL                               |                   |                                     |                                      |
| b.) | MM                                |                   |                                     |                                      |
| c.) | Non-Hodgkin Lymphoma              |                   |                                     |                                      |
| d.) | Other lymphoproliferative disease |                   |                                     |                                      |

**Q12: When do you determine Ig levels?**

|     |                                                   | Always                | Sometimes             | Never                 |
|-----|---------------------------------------------------|-----------------------|-----------------------|-----------------------|
| a.) | At diagnosis of haematological malignancy         | <input type="radio"/> | <input type="radio"/> | <input type="radio"/> |
| i.) | <u>After any</u> infection occurs                 | <input type="radio"/> | <input type="radio"/> | <input type="radio"/> |
| b.) | After the first lower respiratory tract infection | <input type="radio"/> | <input type="radio"/> | <input type="radio"/> |
| c.) | After <u>the first severe</u> infection           | <input type="radio"/> | <input type="radio"/> | <input type="radio"/> |
| d.) | After <u>2 or more severe</u> infections          | <input type="radio"/> | <input type="radio"/> | <input type="radio"/> |
| e.) | During chemotherapy treatment                     | <input type="radio"/> | <input type="radio"/> | <input type="radio"/> |
| f.) | After chemotherapy treatment                      | <input type="radio"/> | <input type="radio"/> | <input type="radio"/> |
| g.) | Before HSCT                                       | <input type="radio"/> | <input type="radio"/> | <input type="radio"/> |
| h.) | After HSCT                                        | <input type="radio"/> | <input type="radio"/> | <input type="radio"/> |

**Q13: Which class of Igs are you measuring?**

*(several answers possible)*

- a) IgG
- b) IgA
- c) IgM
- d) IgG subclasses

**Q14: Are you measuring specific antibody responses?**

- a) Yes, always
- b) No
- c) Yes, in the following cases (several answers possible):
  - i. Before and after vaccination
  - ii. After lower respiratory tract infection and low antibody responses
  - iii. After lower respiratory tract infection and failure to respond to antibiotic prophylaxis
  - iv. Other (please specify)

**Q15: Do you perform test immunisation?**

- a) Yes
- b) No
- c) Sometimes (please specify)

**Q16: In case of hypogammaglobulinemia (IgG<4 g/l), do you prescribe infection prophylaxis in the following situations? (By prophylaxis we mean the prevention of recurring infections)**

|     |                                                                | No                    | Yes, antibiotics only | Yes, Ig only          | Yes, both antibiotics and Ig |
|-----|----------------------------------------------------------------|-----------------------|-----------------------|-----------------------|------------------------------|
| a.) | <u>Before any</u> infection occurs                             | <input type="radio"/> | <input type="radio"/> | <input type="radio"/> | <input type="radio"/>        |
| b.) | If neutropenia is present                                      | <input type="radio"/> | <input type="radio"/> | <input type="radio"/> | <input type="radio"/>        |
| c.) | If vaccination responses against pneumococcus are insufficient | <input type="radio"/> | <input type="radio"/> | <input type="radio"/> | <input type="radio"/>        |
| d.) | <u>After any</u> infection occurs                              | <input type="radio"/> | <input type="radio"/> | <input type="radio"/> | <input type="radio"/>        |
| e.) | After the first lower respiratory tract infection              | <input type="radio"/> | <input type="radio"/> | <input type="radio"/> | <input type="radio"/>        |
| f.) | After <u>the first severe</u> infection                        | <input type="radio"/> | <input type="radio"/> | <input type="radio"/> | <input type="radio"/>        |
| g.) | After <u>2 or more severe</u> infections                       | <input type="radio"/> | <input type="radio"/> | <input type="radio"/> | <input type="radio"/>        |
| h.) | Other (specify)                                                | <input type="radio"/> | <input type="radio"/> | <input type="radio"/> | <input type="radio"/>        |

*Question Q17: is only shown if respondents are not using Ig prophylaxis, it's the final question for these respondents.*

**Q17: What are your main reasons for not using IgG therapy for prophylaxis? (By prophylaxis we mean the prevention of recurring infections)**

*Please rate according to importance (1 very low importance; 5 very high importance)*

- a) No clear treatment recommendations 1 - 2 - 3 - 4 - 5
- b) Too little clinical evidence 1 - 2 - 3 - 4 - 5
- c) No guidelines from Haematological Organisations 1 - 2 - 3 - 4 - 5
- d) Cost or reimbursement reasons 1 - 2 - 3 - 4 - 5
- e) Other (please specify) 1 - 2 - 3 - 4 - 5

*Questions Q18: to Q27: are only shown if respondents are using Ig prophylaxis*

### Q18: What are your main reasons for starting IgG therapy?

Please rate according to importance (1 very low importance; 5 very high importance)

- a) Level of IgG 1 - 2 - 3 - 4 - 5
- b) Severity of infections 1 - 2 - 3 - 4 - 5
- c) Frequency of infections 1 - 2 - 3 - 4 - 5
- d) Type of infections 1 - 2 - 3 - 4 - 5
- e) Resistance to antibiotic treatment 1 - 2 - 3 - 4 - 5
- f) Start of immunosuppressive therapy 1 - 2 - 3 - 4 - 5
- g) Missing specific antibody responses 1 - 2 - 3 - 4 - 5

Choice f) is shown only if respondent refers patients to an immunologist for Ig treatment

### Q19: At what monthly dose do you initiate IgG therapy on average?

- a) <0.2 g/kg
- b) 0.2-0.4 g/kg
- c) 0.4-0.5g/kg
- d) >0.5 g/kg
- e) Standard dose irrespective of body weight (please specify)
- f) I don't know

Choice c) is shown only if respondent refers patients to an immunologist for Ig treatment

### Q20: Do you use IgG therapy seasonally (winter only)?

- a) Yes
- b) No
- c) I don't know

Q21: is shown only if respondent refers patients to an immunologist for Ig treatment

### Q21: Of the patients you referred to your local immunologist for Ig therapy over the last 12 months, do you know how many were treated with or without antibiotics in parallel?

- a) Yes
- b) No

Blue text, purple text and different columns shown based on different participant characteristics (purple text if respondent refers patients to an immunologist for Ig treatment, blue text otherwise; columns A & B if respondent knows the proportion of patients treated with and without antibiotics, column C is otherwise)

**Q22: How many patients have you treated with IgG over the last 12 months?**

**How many patients have you referred to your local immunologist for Ig therapy over the last 12 months?**

|     |                                   | A                               | B                                  | C                                     |
|-----|-----------------------------------|---------------------------------|------------------------------------|---------------------------------------|
|     |                                   | Ig with antibiotics in parallel | Ig without antibiotics in parallel | # of patients referred for Ig therapy |
| a.) | CLL                               |                                 |                                    |                                       |
| b.) | MM                                |                                 |                                    |                                       |
| c.) | Non-Hodgkin Lymphoma              |                                 |                                    |                                       |
| d.) | Other lymphoproliferative disease |                                 |                                    |                                       |

Choice c) is shown only if respondent refers patients to an immunologist for Ig treatment

**Q23: Of the [Sum of all answers in “Q22:”] patients you have treated with Ig over the last 12 months, which percentage received intravenous (IVIG) vs. subcutaneous immunoglobulins (SCIG)?**

- a) IVIG (indicate percentage)
- b) SCIG (indicate percentage)
- c) I don't know

Choice e) is shown only if respondent refers patients to an immunologist for Ig treatment

**Q24: For how long do you treat the majority of your patients with Ig therapy (mean time, number of months)?**

|     |                                   | Mean number of months | Patients who do not undergo HSCT | Patients who underwent HSCT |
|-----|-----------------------------------|-----------------------|----------------------------------|-----------------------------|
| a.) | CLL                               | ___ months            | ___ months                       | ___ months                  |
| b.) | MM                                | ___ months            | ___ months                       | ___ months                  |
| c.) | Non-Hodgkin Lymphoma              | ___ months            | ___ months                       | ___ months                  |
| d.) | Other lymphoproliferative disease | ___ months            | ___ months                       | ___ months                  |

- e.) I don't know



**Q25: What is the main reason for discontinuing IgG therapy in the majority of your patients?**

*(Choose one answer only)*

- a) Disease remission
- b) No infections during the past 6 months
- c) IgG trough levels
- d) No infection during the past 12 months and adequate specific antibody responses
- e) Other (please specify)

**Q26: How satisfied are you with Ig therapy to prevent infections?**

*Please rate from 5 (completely satisfied) to 1 (completely dissatisfied)*

1      2      3      4      5

**Q27: Do you foresee any change in your IgG therapy usage pattern in terms of frequency and indications over the next 3 years?**

- a) Will use Ig more frequently and for a broader range of conditions
- b) Will use Ig as frequently as today and for a broader range of conditions
- c) Will use Ig less frequently
- d) I foresee no change in my Ig use

*Please explain your choice below:*

**The survey is complete**

Thank you for completing the survey and for your time today.
